# Supplementary material
Source: PubMed Central journal article supplement (PMC3865864)

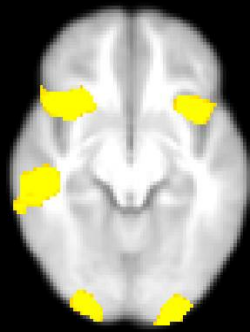

$z=-10$

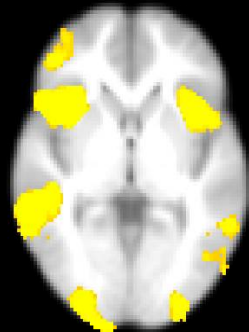

$z=0$

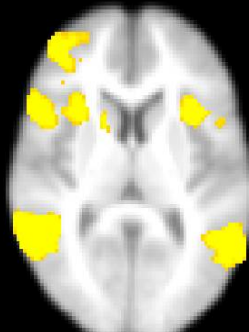

$z=10$

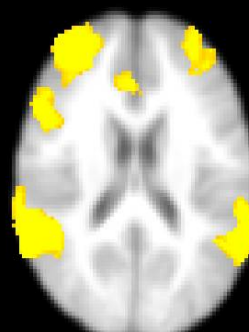

$z=20$

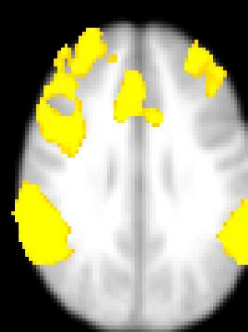

$z=30$

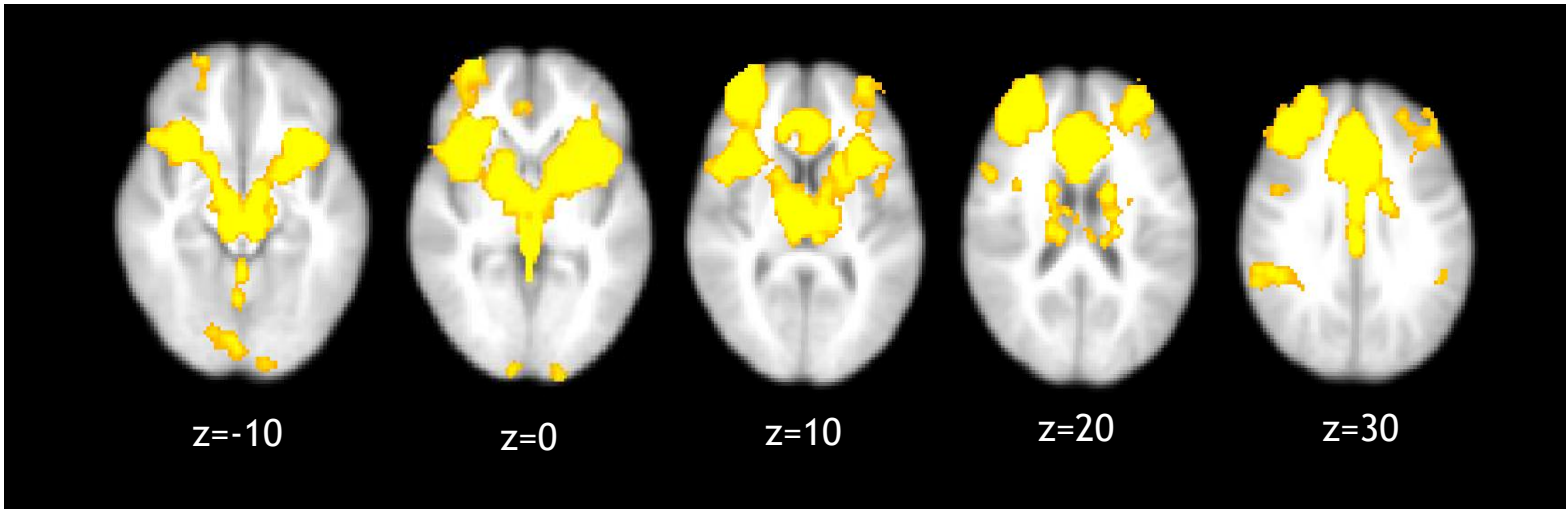

(b)

L

Supplement: NIHMS439249-supplement-1.pdf [file NIHMS439249-supplement-1.pdf]
